# Supplementary material
Source: MDPI journal article supplement (https://www.mdpi.com/2076-3417/8/2/209)
Supplement: s1 [file s1]

Artile

SUPPLEMENTARY INFORMATION

Highly Graphitic Carbon Nanofibers Web as a Cathode Material for Lithium Oxygen Batteries

Hyungkyu Han 1, Yeryung Jeon 2, Zhiming Liu 2 and Taeseup Song 2,*

1 Regional Centre of Advanced Technologies and Materials, Department of Physical Chemistry,
Faculty of Science, Palacky University, Slechtitelu 11, 783 71 Olomouc, Czech Republic; hyungkyu85@gmail.com

2 Department of Energy Engineering, Hanyang University, Seoul 133-791, Korea;
jeonye8753@gmail.com (Y.J.); skyandsealiu@gmail.com (Z.L.)

***** Correspondence: tssong@hanyang.ac.kr

| **Carbon materials**  **(for oxygen electrode)** | **Electrolyte** | **Difference of charge and discharge voltage (V)** | **Current density** | **Capacity (mAh gc-1)** | **Ref.** |
| --- | --- | --- | --- | --- | --- |
| Super P carbon + α-MnO2 | LiPF6-PC | 1.3 | 70 mA gc-1 | 1,000 | 1 |
| Chevlon carbon + Co-phthalocyanine | LiPF6-PC-EC-PAN | 0.92 | 0.1 mA cm-2(discharge)  0.05 mA cm-2(charge) | 520 | 2 |
| Super P carbon + MnO2 | LiTFSi-PC | 1.8 | 0.02 mA cm-2 | 800 | 3 |
| BP2000 carbon black | LiPF6-TEGDME | 1.4 | 0.13 mA cm-2 | 800 | 4 |
| Super P carbon | LiPF6-TEGDME | 1.8 | 70 mA gc-1 | 3,000 | 5 |
| Carbon on carbon paper | LiCF3SO3-TEGDME | 1.7 | 500 mA gc-1 | 3,000 | 6 |
| CNT fibril | TEGDME | 1.6 | 2000 mA g-1 | 1,000 | 7 |
| All-carbon-nanofiber | LiPF6-EC:DMC | ~1.55 | 43mA gc-1 | ~5,000 | 8 |
| Graphene nanosheets | LiClO4-PC | 1.22 | 0.1 mA cm-2 | 2,332 | 9 |
| Porous graphene nanoarchitectures | DMSO | 1.579 | 200 mA g-1 | 29,375 | 10 |
| CNF 1000 (this work) | LiTFSi-TEGDME | 1.58 | 50 mA gc-1 | 1,000 |  |
| CNF 1200 (this work) | LiTFSi-TEGDME | 1.42 | 50 mAg gc-1 | 1,000 |  |
| CNF 1400 (this work) | LiTFSi-TEGDME | 1.16 | 50 mAg gc-1 | 1,000 |  |

**Table 1.** Some typical achievements for lithium oxygen cells in cathode materials, electrolytes, difference of charge and discharge voltage, and current density.

**Figure S1.** Sheet resistance of CNF 1000, CNF 1200 and CNF 1400.

**Figure S2.** XPS analysis N1s of CNF 1000, 1200 and 1400.

**Figure S3.** Voltage profile and SEM images of (a, b and c) CNF 1000, (d, e and f) CNF 1200 and (g, h and i) CNF 1400 after fully discharging.

References

1. Ogasawara, T.; Debart, A.; Holzapfel, M.; Novak, P.; Bruce, P. G., Rechargeable Li2o2 Electrode for Lithium Batteries. *J Am Chem Soc* **2006**, *128*, 1390–1393.
2. Abraham, K. M.; Jiang, Z., A Polymer Electrolyte-Based Rechargeable Lithium/Oxygen Battery. *J Electrochem Soc* **1996**, *143*, 1–5.
3. Mizuno, F.; Nakanishi, S.; Kotani, Y.; Yokoishi, S.; Iba, H., Rechargeable Li-Air Batteries with Carbonate-Based Liquid Electrolytes. *Electrochemistry* **2010**, *78*, 403–405.
4. Laoire, C. O.; Mukerjee, S.; Plichta, E. J.; Hendrickson, M. A.; Abraham, K. M., Rechargeable Lithium/Tegdme-Lipf6/O-2 Battery. *J Electrochem Soc* **2011**, *158*, A302–A308.
5. Carboni, M.; Brutti, S.; Marrani, A. G., Surface Reactivity of a Carbonaceous Cathode in a Lithium Triflate/Ether Electrolyte-Based Li-O-2 Cell. *Acs Appl Mater Inter* **2015**, *7*, 21751–21762.
6. Jung, H. G.; Hassoun, J.; Park, J. B.; Sun, Y. K.; Scrosati, B., An Improved High-Performance Lithium-Air Battery. *Nat Chem* **2012**, *4*, 579–585.
7. Lim, H. D., et al., Superior Rechargeability and Efficiency of Lithium-Oxygen Batteries: Hierarchical Air Electrode Architecture Combined with a Soluble Catalyst. *Angew Chem Int Edit* **2014**, *53*, 3926–3931.
8. Mitchell, R. R.; Gallant, B. M.; Thompson, C. V.; Shao-Horn, Y., All-Carbon-Nanofiber Electrodes for High-Energy Rechargeable Li-O-2 Batteries. *Energ Environ Sci* **2011**, *4*, 2952–2958.
9. Sun, B.; Wang, B.; Su, D. W.; Xiao, L. D.; Ahn, H.; Wang, G. X., Graphene Nanosheets as Cathode Catalysts for Lithium-Air Batteries with an Enhanced Electrochemical Performance. *Carbon* **2012**, *50*, 727–733.
10. Sun, B.; Huang, X. D.; Chen, S. Q.; Munroe, P.; Wang, G. X., Porous Graphene Nanoarchitectures: An Efficient Catalyst for Low Charge-Overpotential, Long Life, and High Capacity Lithium-Oxygen Batteries. *Nano Lett* **2014**, *14*, 3145–3152.
